# Supplementary material for: A 2-to-2′ 18-to-18′ doubly linked Ni(ii) norcorrole dimer: an effectively conjugated antiaromatic dyad
Source: Royal Society of Chemistry journal article supplement (doi:10.1039/d0cc02543g), 2020-01-01
Supplement: d0cc02543g1.pdf [file d0cc02543g1.pdf]

# Supporting Information

## A 2-to-2' 18-to18' doubly linked Ni(II) norcorrole dimer: an effectively conjugated antiaromatic dyad

Si-Yu Liu,<sup>a</sup> Hiroyuki Kawashima,<sup>a</sup> Norihito Fukui,<sup>a</sup>  
and Hiroshi Shinokubo<sup>\*a</sup>

<sup>a</sup>*Department of Molecular and Macromolecular Chemistry, Graduate School of Engineering,  
Nagoya University, Chikusa-ku, Nagoya, Aichi 464-8603, Japan.*

E-mail: hshino@chembio.nagoya-u.ac.jp

### Table of Contents

|                                                                   |     |
|-------------------------------------------------------------------|-----|
| Instrumentation and Materials .....                               | S2  |
| Synthetic Procedure and Characterizations of Compounds .....      | S3  |
| <sup>1</sup> H and <sup>13</sup> C NMR Spectra of Compounds ..... | S6  |
| X-ray Diffraction Analysis .....                                  | S11 |
| Electrochemical Analysis .....                                    | S16 |
| Theoretical Calculations .....                                    | S17 |
| References .....                                                  | S23 |

## Instrumentation and Materials

$^1\text{H}$  NMR (500 MHz) and  $^{13}\text{C}$  NMR (126 MHz) spectra were recorded on a Bruker AVANCE III HD spectrometer. Chemical shifts were reported as the delta scale in ppm relative to  $\text{CHCl}_3$  ( $\delta = 7.260$  ppm) for  $^1\text{H}$  NMR and  $\text{CDCl}_3$  ( $\delta = 77.16$  ppm) for  $^{13}\text{C}$  NMR. UV/vis/NIR absorption spectra were recorded on a Shimadzu UV-2550 or JASCO V670 spectrometer. High-resolution electrospray ionization time-of-flight (ESI-TOF) mass spectra were taken on a Bruker micrOTOF instrument. 3-Bromonorcorrole and 2-bromonorcorrole were synthesized according to the literature.<sup>1</sup> Unless otherwise noted, materials obtained from commercial suppliers were used without further purification.

## Synthetic Procedure and Characterizations of Compounds

### Synthesis of 3-to-3' singly linked Ni(II) norcorrole dimer **7**

A Schlenk flask containing Ni(II) 3-bromo-5,15-dimesitylnorcorrole **6** (12.73 mg, 19.4  $\mu\text{mol}$ ), Ni(cod)<sub>2</sub> (10.67 mg, 38.8  $\mu\text{mol}$ ), and dry THF (2 mL) was prepared in argon-filled glove box. The solution was stirred at 60 °C for 2 h. The resulting mixture was passed through a short pad of alumina with CHCl<sub>3</sub>. The solution concentrated *in vacuo*. The residue was purified by silica-gel column chromatography (hexane/CH<sub>2</sub>Cl<sub>2</sub> = 2/1 as an eluent). The solvent was removed *in vacuo*. The residue was further purified by silica-gel column chromatography (hexane/CH<sub>2</sub>Cl<sub>2</sub> = 5/1 as an eluent). The collected brown band was concentrated. Recrystallization from CHCl<sub>3</sub>/MeOH afforded **7** (5.44 mg, 4.72  $\mu\text{mol}$ , 49%). <sup>1</sup>H NMR (500 MHz, CDCl<sub>3</sub>):  $\delta$  = 7.05 (s, 4H, Mes), 6.17 (s, 4H, Mes), 3.20 (s, 12H, *o*-Me), 2.71 (s, 12H, *o*-Me), 2.27 (s, 6H, *p*-Me), 1.76 (s, 6H, *p*-Me), 1.53 (d, *J* = 4.5 Hz, 2H,  $\beta$ -H), 1.45 (d, *J* = 4.0 Hz, 2H,  $\beta$ -H), 1.44 (d, *J* = 4.0 Hz, 2H,  $\beta$ -H), 1.36 (d, *J* = 4.0 Hz, 2H,  $\beta$ -H), 1.32 (d, *J* = 4.0 Hz, 2H,  $\beta$ -H), 0.83 (d, *J* = 4.5 Hz, 2H,  $\beta$ -H), -1.57 (s, 2H,  $\beta$ -H) ppm; <sup>13</sup>C NMR (500 MHz, CDCl<sub>3</sub>):  $\delta$  = 169.1, 167.4, 166.5, 165.6, 158.0, 157.4, 149.7, 148.0, 147.5, 145.7, 137.2, 136.7, 136.1, 133.7, 133.3, 129.7, 129.2, 128.2 (overlap), 127.9, 126.5, 125.9, 114.8, 114.4, 113.8 (overlap), 21.0, 20.5, 18.4, 17.4 ppm; UV/vis (CH<sub>2</sub>Cl<sub>2</sub>):  $\lambda_{\text{max}}$  ( $\epsilon$  [M<sup>-1</sup> cm<sup>-1</sup>]) = 438 (59000), 529 (28079) nm; ESI-MS: *m/z* = 1152.3447, calcd for (C<sub>72</sub>H<sub>58</sub>N<sub>8</sub>Ni<sub>2</sub>)<sup>+</sup> = 1152.3447 [M<sup>+</sup>].

### Synthesis of 2-to-2' singly linked Ni(II) norcorrole dimer **9**

A Schlenk flask containing Ni(II) 2-bromo-5,15-dimesitylnorcorrole **8** (26.42 mg, 40.2  $\mu\text{mol}$ ), Ni(cod)<sub>2</sub> (22.11 mg, 80.4  $\mu\text{mol}$ ), and dry THF (5 mL) was prepared in argon-filled glove box. The solution was stirred at 60 °C for 2 h. The resulting mixture was passed through a short pad of alumina with CHCl<sub>3</sub>. The solution was concentrated *in vacuo*. The residue was purified by silica-gel column chromatography (hexane/CH<sub>2</sub>Cl<sub>2</sub> = 2/1 as an eluent). The solvent was removed *in vacuo*. The residue was further purified by silica-gel column chromatography (hexane/CH<sub>2</sub>Cl<sub>2</sub> = 5/1 as an eluent). The collected red band was concentrated. Recrystallization from CH<sub>2</sub>Cl<sub>2</sub>/MeOH afforded **9** (15.98 mg, 13.9  $\mu\text{mol}$ , 69%).

<sup>1</sup>H NMR (500 MHz, CDCl<sub>3</sub>):  $\delta$  = 6.20 (s, 4H, Mes), 5.79 (s, 4H, Mes), 2.80 (s, 12H, *o*-Me), 2.44 (s, 12H, *o*-Me), 1.79 (s, 6H, *p*-Me), 1.49 (s, 6H, *p*-Me), 1.38 (d, *J* = 4.5 Hz, 2H,  $\beta$ -H), 1.22 (d, *J* = 4.0 Hz, 4H,  $\beta$ -H), 1.10 (d, *J* = 4.5 Hz, 2H,  $\beta$ -H), 1.03 (d, *J* = 4.0 Hz, 2H,  $\beta$ -H), 0.38 (d, *J* = 4.0 Hz, 2H,  $\beta$ -H), -1.07 (s, 2H,  $\beta$ -H) ppm; <sup>13</sup>C NMR (500 MHz, CDCl<sub>3</sub>):  $\delta$  = 169.9, 167.9, 166.1, 165.3, 158.5, 157.3, 148.6, 148.5, 148.2, 146.3, 136.9, 136.6, 133.4, 132.6, 130.4, 128.9, 128.2, 128.1, 127.7, 125.5, 124.7, 120.7, 120.5, 115.3, 115.2, 114.8, 20.6, 20.4, 17.5, 17.1 ppm; UV/vis (CH<sub>2</sub>Cl<sub>2</sub>):  $\lambda_{\text{max}}$  ( $\epsilon$  [M<sup>-1</sup> cm<sup>-1</sup>]) = 442 (73014), 562 (48675) nm; ESI-MS: *m/z* = 1152.3439, calcd for (C<sub>72</sub>H<sub>58</sub>N<sub>8</sub>Ni<sub>2</sub>)<sup>+</sup> = 1152.3447 [M<sup>+</sup>].

### Synthesis of 2-to-2' 18-to-18' doubly linked Ni(II) norcorrole dimer **10**

A three-necked flask containing 2-to-2' singly linked norcorrole dimer **9** (20.0 mg, 17.4  $\mu\text{mol}$ ) was evacuated and then refilled with  $\text{N}_2$ . To the flask,  $\text{CH}_2\text{Cl}_2$  (350 mL) was added. A solution of silver hexafluorophosphate (8.80 mg, 34.8  $\mu\text{mol}$ ) in THF (5 mL) was added dropwise. The mixture was stirred at room temperature for 2 h. Aqueous  $\text{Na}_2\text{S}_2\text{O}_4$  solution was added to the mixture. Organic materials were extracted with  $\text{CH}_2\text{Cl}_2$ . The combined organic layers were washed with water and dried over  $\text{Na}_2\text{SO}_4$ . After removing the solvent *in vacuo*, the residue was purified by silica-gel column chromatography (hexane/ $\text{CH}_2\text{Cl}_2$  = 5/1 as an eluent). The collected green band was concentrated. Recrystallization from  $\text{CHCl}_3/\text{MeOH}$  afforded **10** (4.00 mg, 3.48  $\mu\text{mol}$ , 20%).  $^1\text{H}$  NMR (500 MHz,  $\text{CDCl}_3/\text{CS}_2$  = 1/1):  $\delta$  = 5.76 (s, 8H, Mes), 2.64 (s, 24H, *o*-Me), 1.45 (s, 12H, *p*-Me), 0.09 (d,  $J$  = 4.5 Hz, 4H,  $\beta$ -H), 0.05 (d,  $J$  = 4.5 Hz, 4H,  $\beta$ -H), -1.85 (s, 4H,  $\beta$ -H) ppm; UV/vis ( $\text{CH}_2\text{Cl}_2$ ):  $\lambda_{\text{max}}$  ( $\epsilon$  [ $\text{M}^{-1} \text{cm}^{-1}$ ]) = 448 (48399), 651 (60055) nm; ESI-MS:  $m/z$  = 1150.3316, calcd for  $(\text{C}_{72}\text{H}_{56}\text{N}_8\text{Ni}_2)^+ = 1150.3316$  [ $\text{M}^+$ ]. (The  $^{13}\text{C}$  NMR spectrum of **10** was not obtained because of the low solubility.)

# <sup>1</sup>H and <sup>13</sup>C NMR Spectra of Compounds

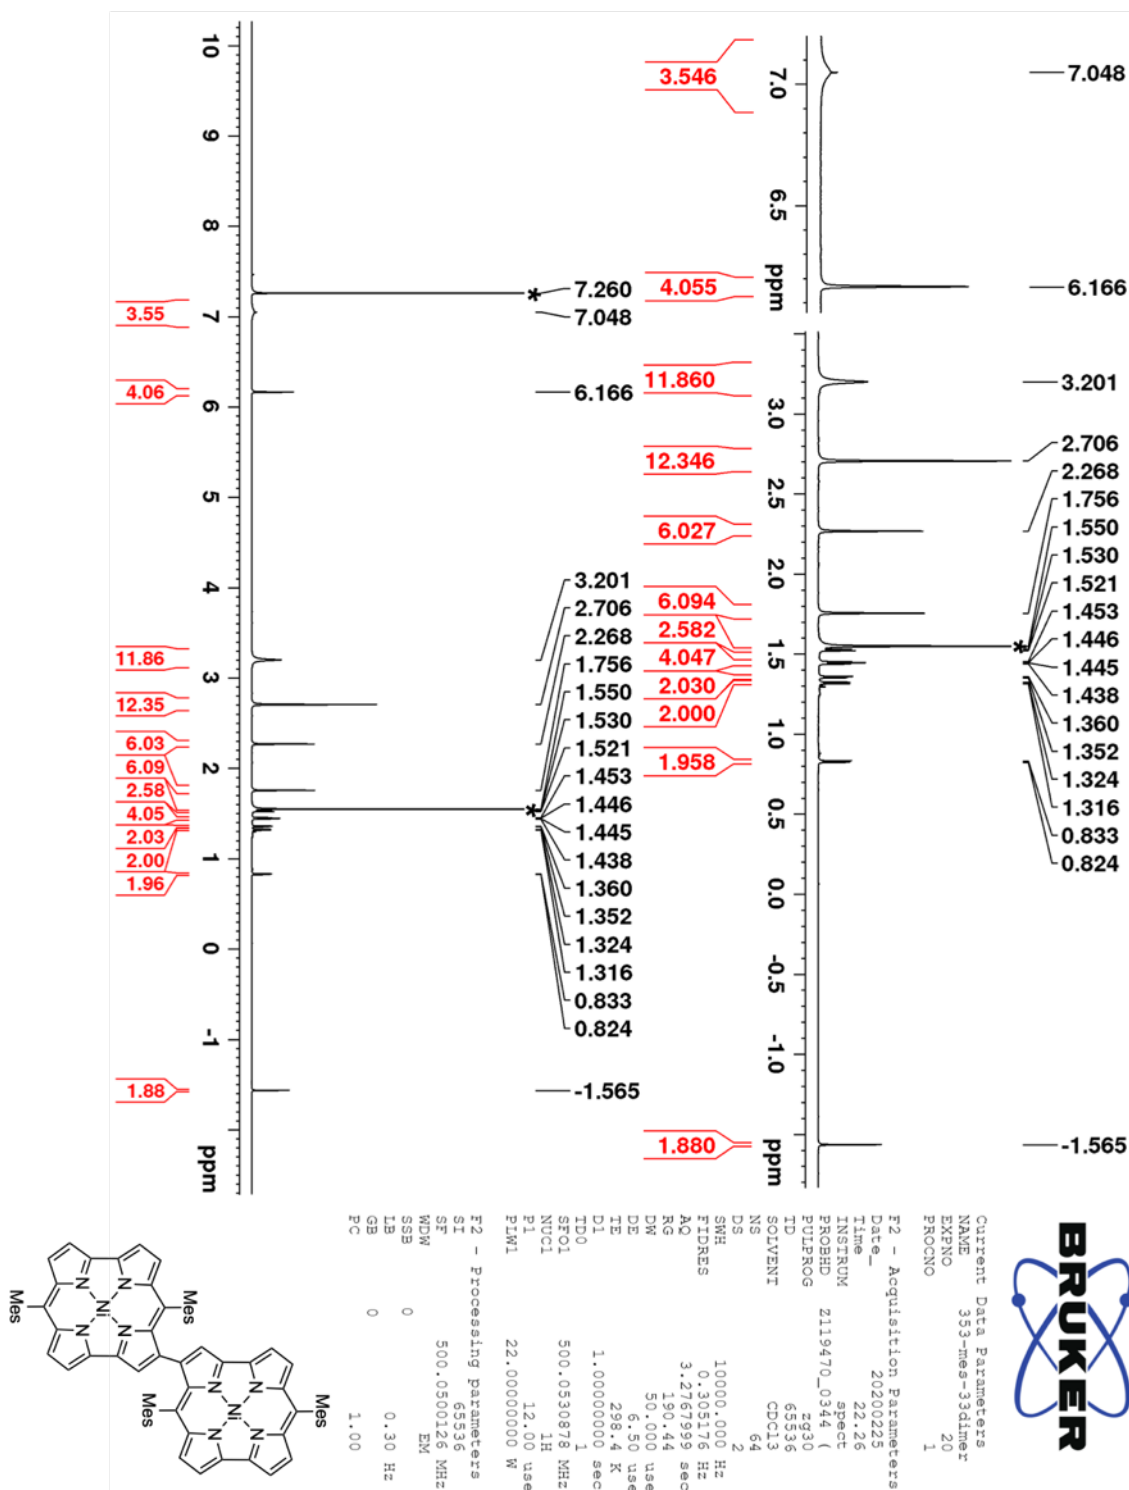

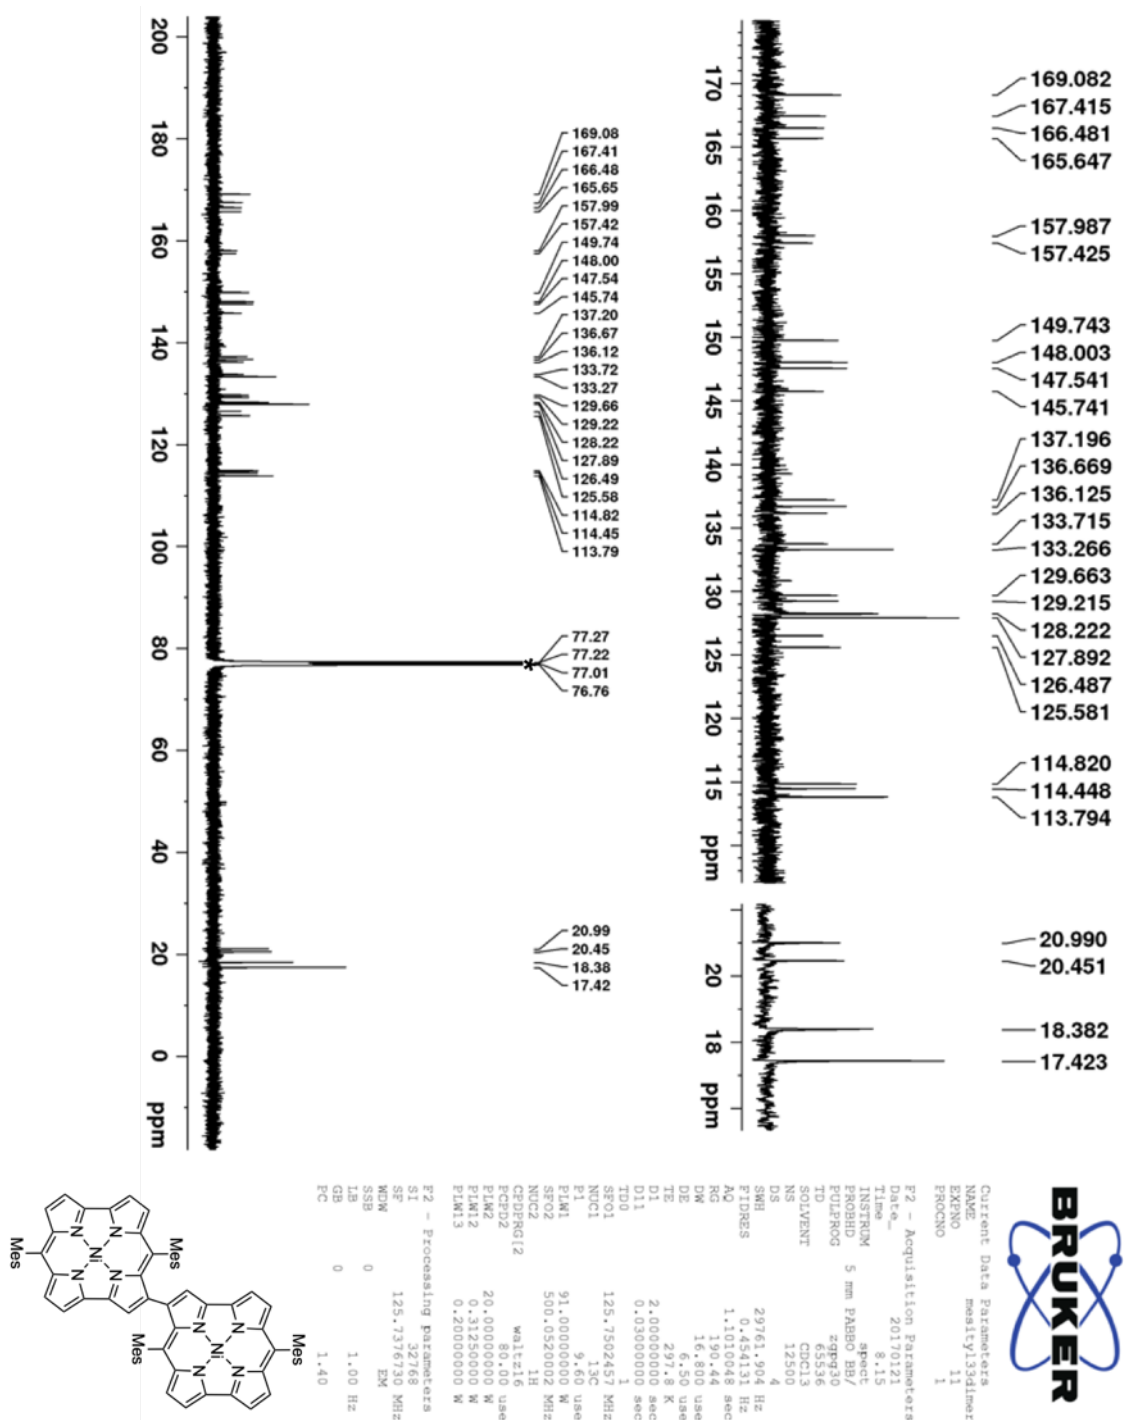

Figure S2. <sup>13</sup>C NMR spectrum of **7** in CDCl<sub>3</sub> at 25 °C. \*Solvent peaks.

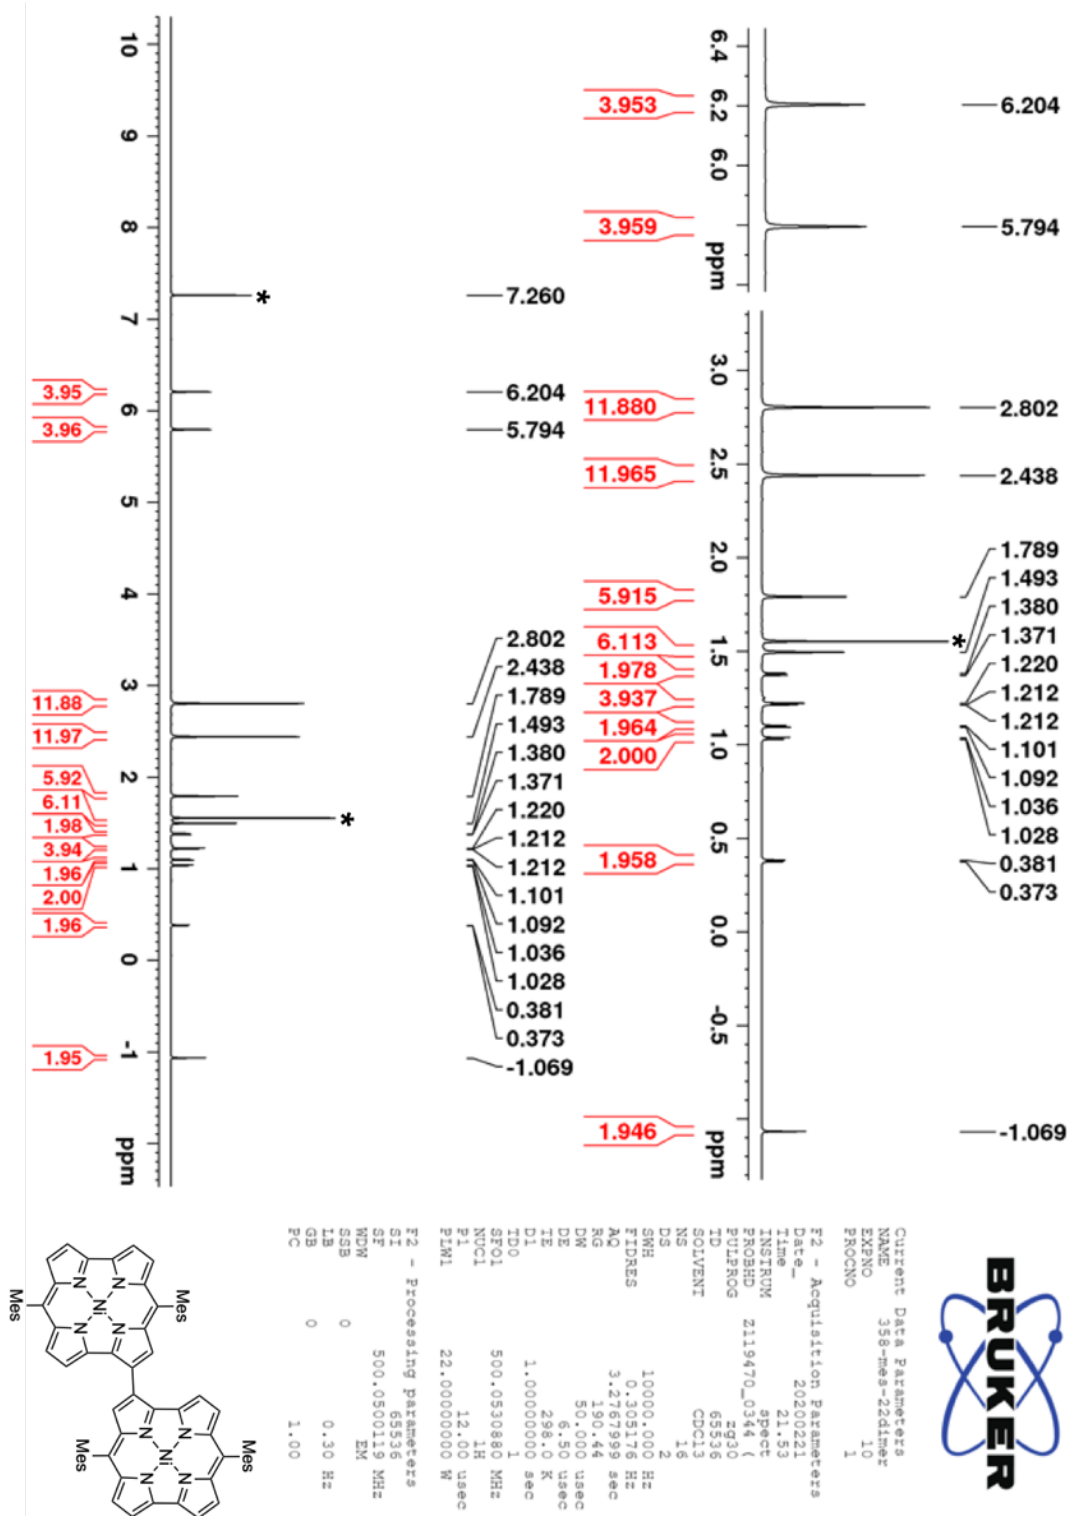

**Figure S3.** <sup>1</sup>H NMR spectrum of **9** in CDCl<sub>3</sub> at 25 °C. \*Solvent peaks.



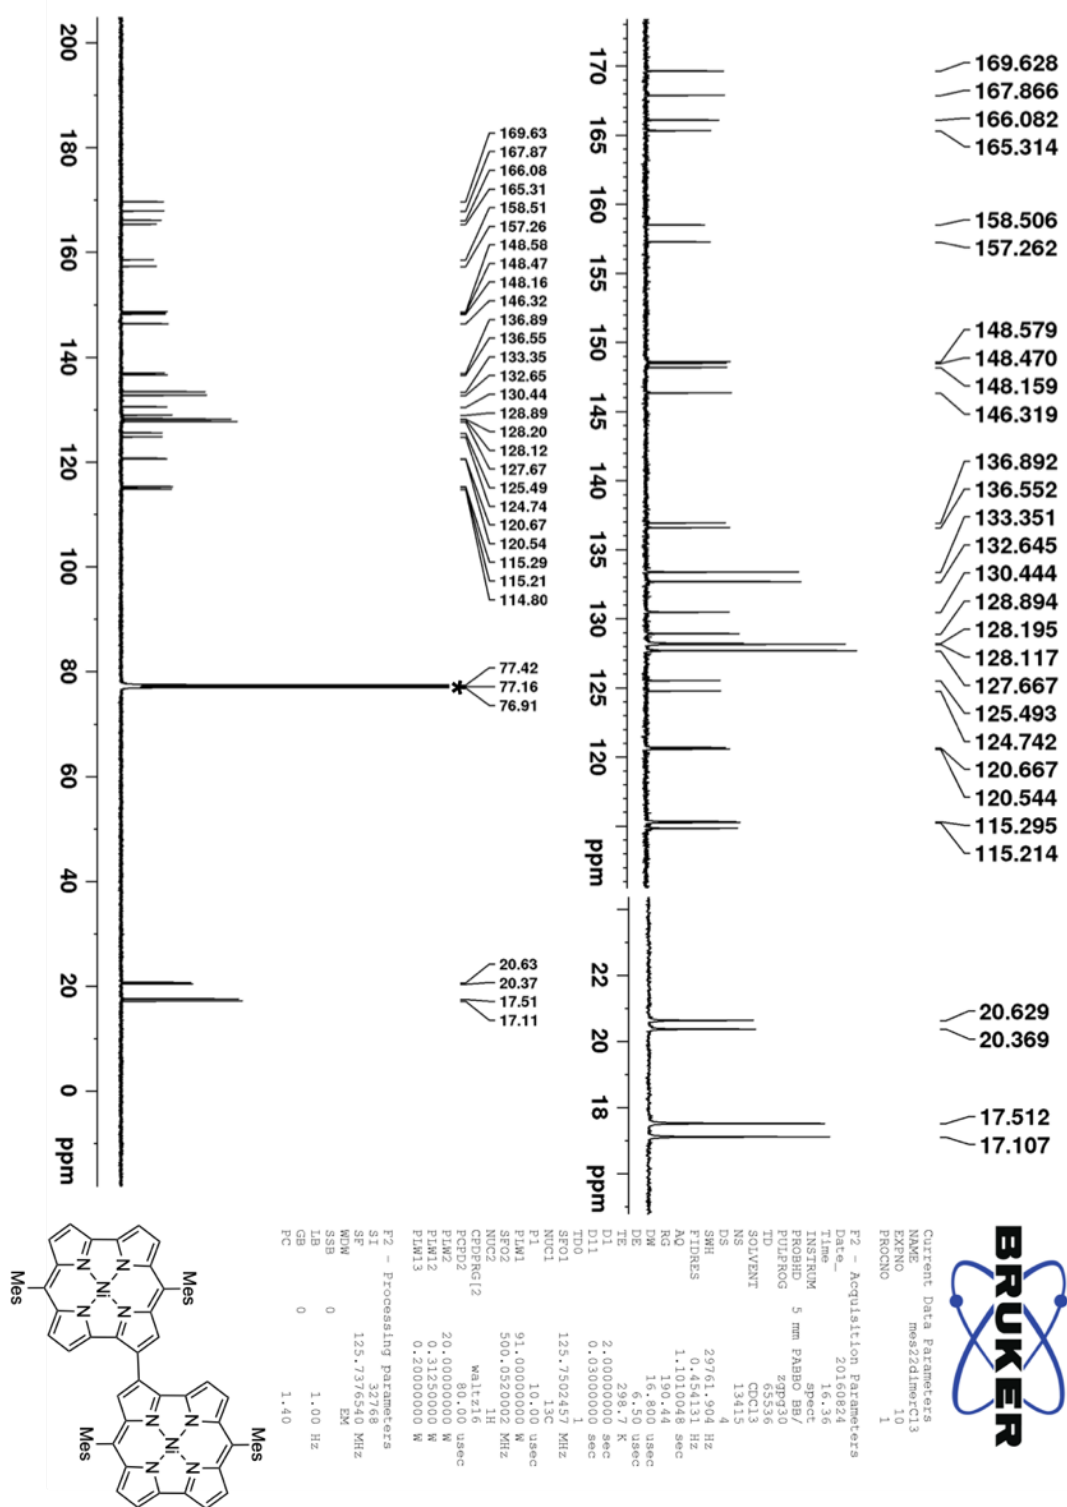

**Figure S4.** <sup>13</sup>C NMR spectrum of **9** in CDCl<sub>3</sub> at 25 °C. \*Solvent peaks.

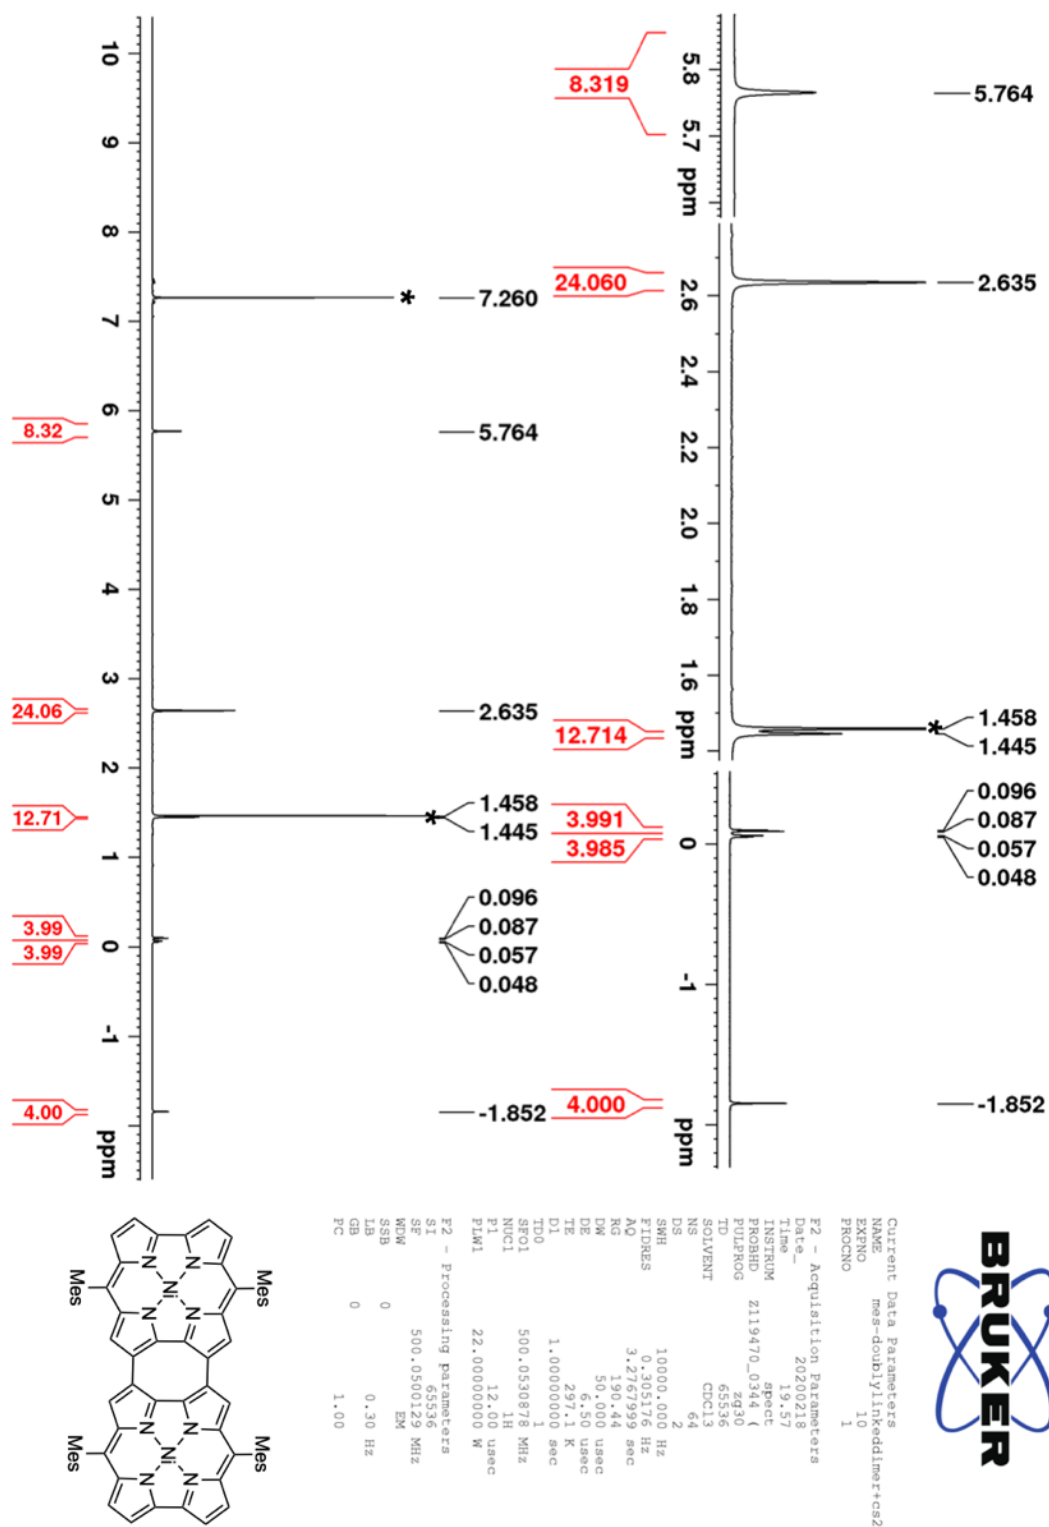

**Figure S5.**  $^1\text{H}$  NMR spectrum of **10** in  $\text{CDCl}_3/\text{CS}_2 = 1/1$  at  $25^\circ\text{C}$ . \*Solvent peaks.

### **X-ray Diffraction Analysis**

X-ray data of **7**, **9**, and **10** were taken on a Rigaku CCD diffractometer (Saturn 724 with MicroMax-007) with Varimax Mo optics using graphite monochromated Mo-K $\alpha$  radiation ( $\lambda = 0.71075$  Å). Crystallographic details are given in CIF files. Fine crystals of **7** suitable for the X-ray diffraction analysis were obtained by the vapor diffusion of methanol into its 1,2-dichloroethane solution. Fine crystals of **9** suitable for the X-ray diffraction analysis were obtained by the vapor diffusion of ethanol into its chloroform solution. Fine crystals of **10** suitable for the X-ray diffraction analysis were obtained by the vapor diffusion of methanol into its 1,1,2,2-tetrachloroethane solution. Crystallographic data for **7**, **9**, and **10** have been deposited with the Cambridge Crystallographic Data Centre as supplementary publication no. CCDC-1991857, 1991856, and 1991855, respectively.

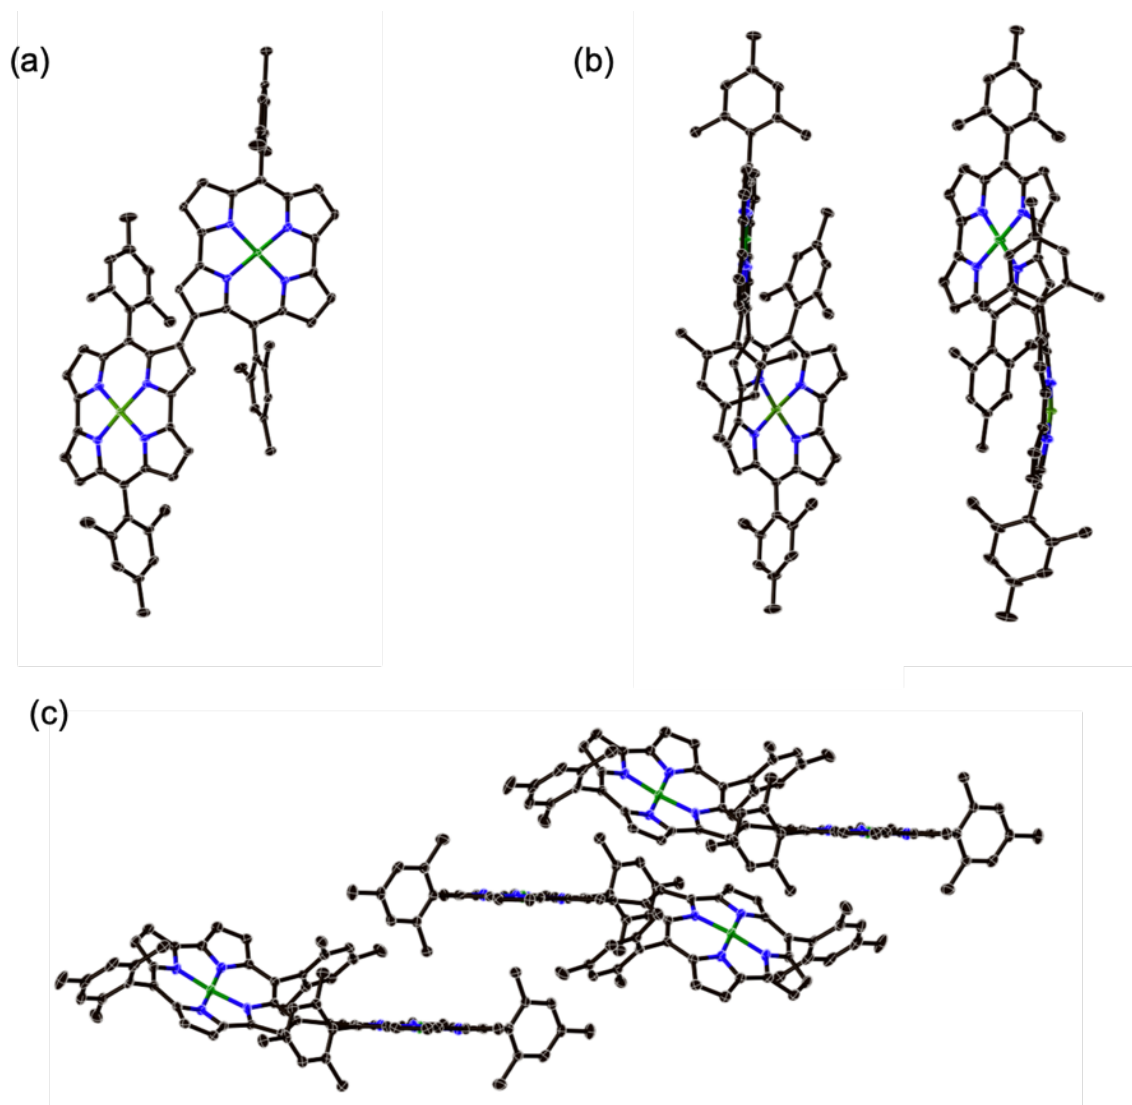

**Figure S6.** X-ray crystal structure of **7**. (a) Top view, (b) side view, and (c) packing structure.

The hydrogen atoms are omitted for clarity. The thermal ellipsoids are scaled at 50% probability level.

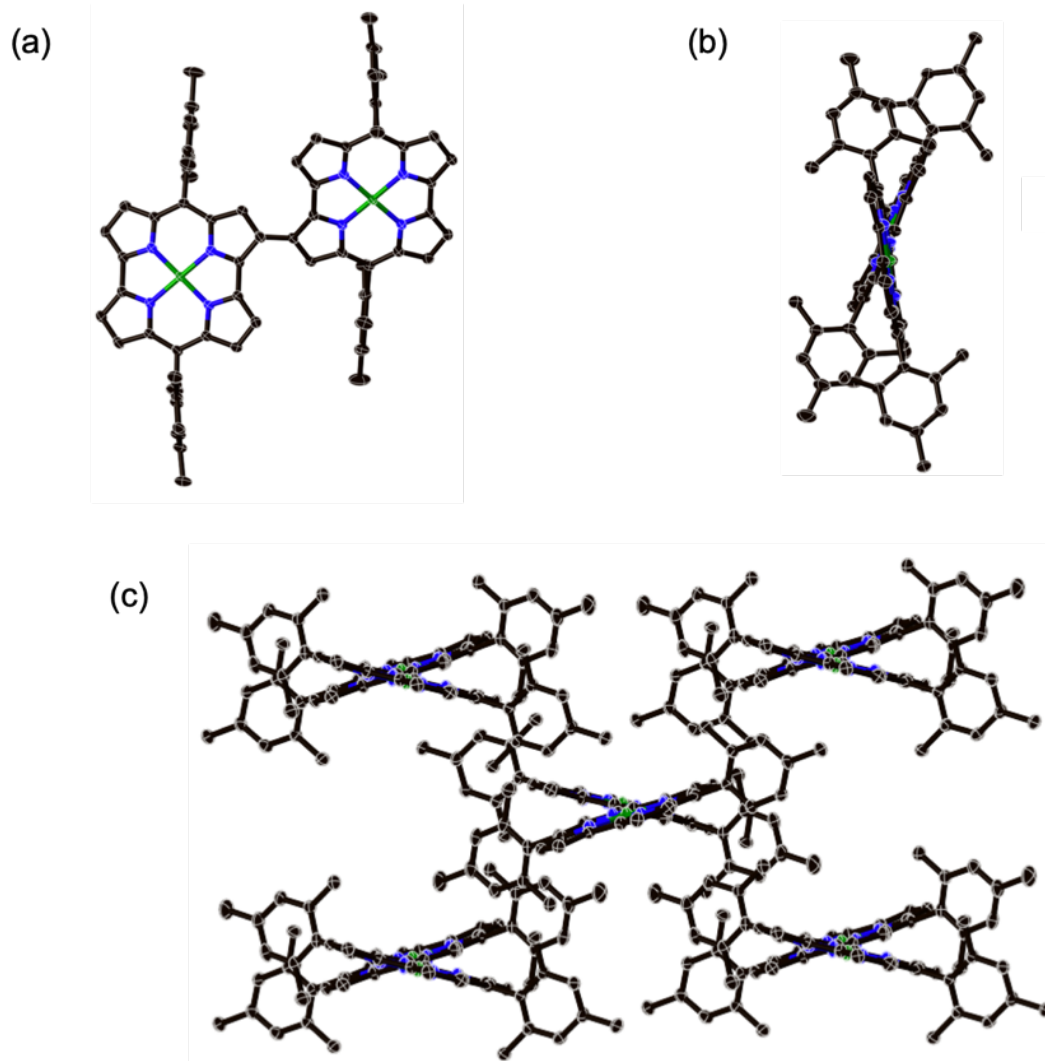

**Figure S7.** X-ray crystal structure of **9**. (a) Top view, (b) side view, and (c) packing structure.

The hydrogen atoms are omitted for clarity. The thermal ellipsoids are scaled at 50% probability level.

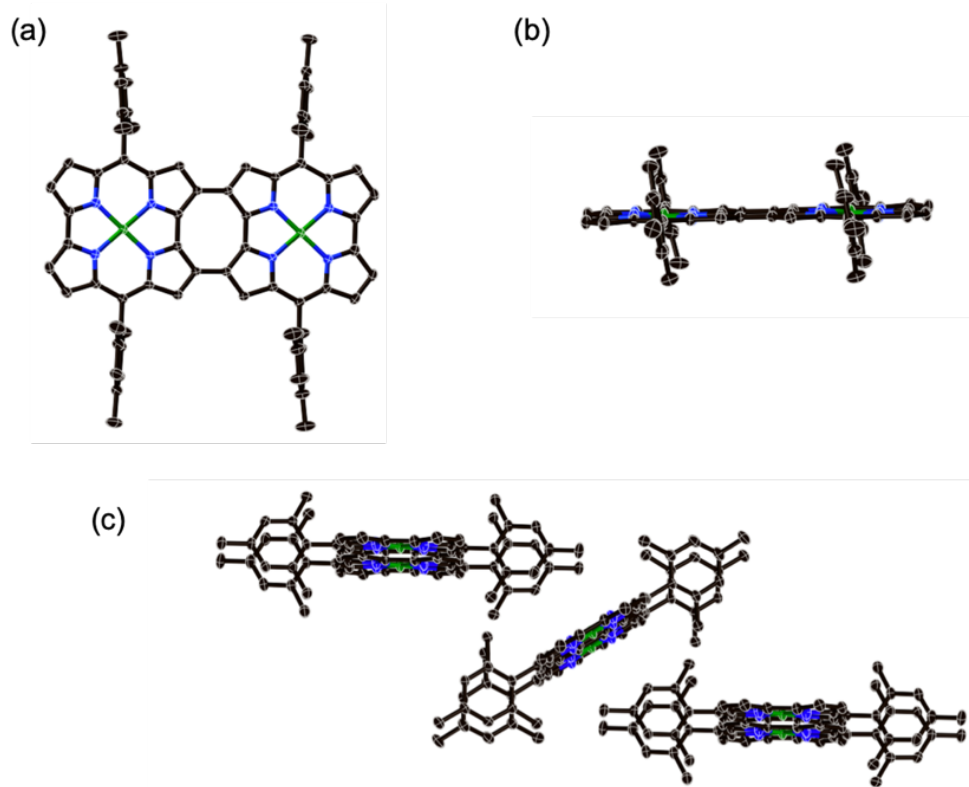

**Figure S8.** X-ray crystal structure of **10**. (a) Top view, (b) side view, and (c) packing structure.

The hydrogen atoms are omitted for clarity. The thermal ellipsoids are scaled at 50% probability level.

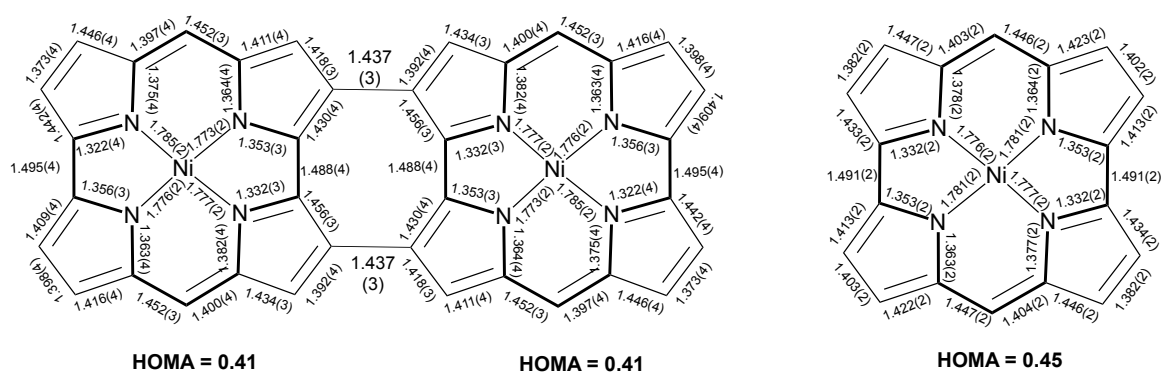

**Figure S9.** Bond lengths in crystal structure of **10** (left) and **1** (right).<sup>2</sup> *meso*-Mesityl substituents are omitted.

**Table S1.** Crystal data and structure refinements for **7**, **9**, and **10**.

| Compound                                            | <b>7</b>                                                                                                            | <b>9</b>                                                                                      | <b>10</b>                                                                                                                 |
|-----------------------------------------------------|---------------------------------------------------------------------------------------------------------------------|-----------------------------------------------------------------------------------------------|---------------------------------------------------------------------------------------------------------------------------|
| Empirical Formula                                   | C <sub>72</sub> H <sub>58</sub> N <sub>8</sub> Ni <sub>2</sub><br>2(C <sub>2</sub> H <sub>4</sub> Cl <sub>2</sub> ) | 0.5(C <sub>72</sub> H <sub>58</sub> N <sub>8</sub> Ni <sub>2</sub> )<br>2(CHCl <sub>3</sub> ) | 0.5(C <sub>72</sub> H <sub>56</sub> N <sub>8</sub> Ni <sub>2</sub> )<br>2(C <sub>2</sub> H <sub>2</sub> Cl <sub>4</sub> ) |
| <i>M<sub>w</sub></i>                                | 1350.58                                                                                                             | 815.08                                                                                        | 911.00                                                                                                                    |
| Crystal System                                      | triclinic                                                                                                           | monoclinic                                                                                    | monoclinic                                                                                                                |
| Space Group                                         | <i>P</i> −1 (No. 2)                                                                                                 | <i>C</i> 2/ <i>c</i> (No. 15)                                                                 | <i>P</i> 2 <sub>1</sub> / <i>c</i> (No. 14)                                                                               |
| <i>a</i>                                            | 12.0197(3) Å                                                                                                        | 35.3376(6) Å                                                                                  | 17.4782(4) Å                                                                                                              |
| <i>b</i>                                            | 15.4760(7) Å                                                                                                        | 11.9482(2) Å                                                                                  | 12.6007(2) Å                                                                                                              |
| <i>c</i>                                            | 18.5471(7) Å                                                                                                        | 17.8205(3) Å                                                                                  | 17.9057(3) Å                                                                                                              |
| <i>α</i>                                            | 72.164(4)°                                                                                                          | —                                                                                             | —                                                                                                                         |
| <i>β</i>                                            | 77.709(3)°                                                                                                          | 102.422(2)°                                                                                   | 98.164(2)°                                                                                                                |
| <i>γ</i>                                            | 86.387(3)°                                                                                                          | —                                                                                             | —                                                                                                                         |
| Volume                                              | 3209.0(2) Å <sup>3</sup>                                                                                            | 7348.0(2) Å <sup>3</sup>                                                                      | 3903.54(13) Å <sup>3</sup>                                                                                                |
| <i>Z</i>                                            | 2                                                                                                                   | 8                                                                                             | 4                                                                                                                         |
| Density (calcd.)                                    | 1.398 g/cm <sup>3</sup>                                                                                             | 1.474 g/cm <sup>3</sup>                                                                       | 1.550 g/cm <sup>3</sup>                                                                                                   |
| Completeness                                        | 0.750                                                                                                               | 0.991                                                                                         | 0.951                                                                                                                     |
| Goodness-of-Fit                                     | 1.029                                                                                                               | 1.018                                                                                         | 1.005                                                                                                                     |
| <i>R</i> <sub>1</sub> [ <i>I</i> > 2σ ( <i>I</i> )] | 0.0638                                                                                                              | 0.0901                                                                                        | 0.0536                                                                                                                    |
| <i>wR</i> <sub>2</sub> (all data)                   | 0.1612                                                                                                              | 0.2828                                                                                        | 0.1588                                                                                                                    |
| Temperature [K]                                     | 93(2)                                                                                                               | 93(2)                                                                                         | 93(2)                                                                                                                     |

## Electrochemical Analysis

Cyclic voltammograms of **1**, **7**, **9**, and **10** were recorded on ALS electrochemical analyzer 612C. Measurements were performed in freshly distilled dichloromethane with tetrabutylammonium hexafluorophosphate as electrolyte. A three electrodes system was used and consisted of a grassy carbon working electrode, a platinum wire and Ag/AgNO<sub>3</sub> as the reference electrode. All potentials are referenced to the potential of ferrocene/ferrocenium cation couple.

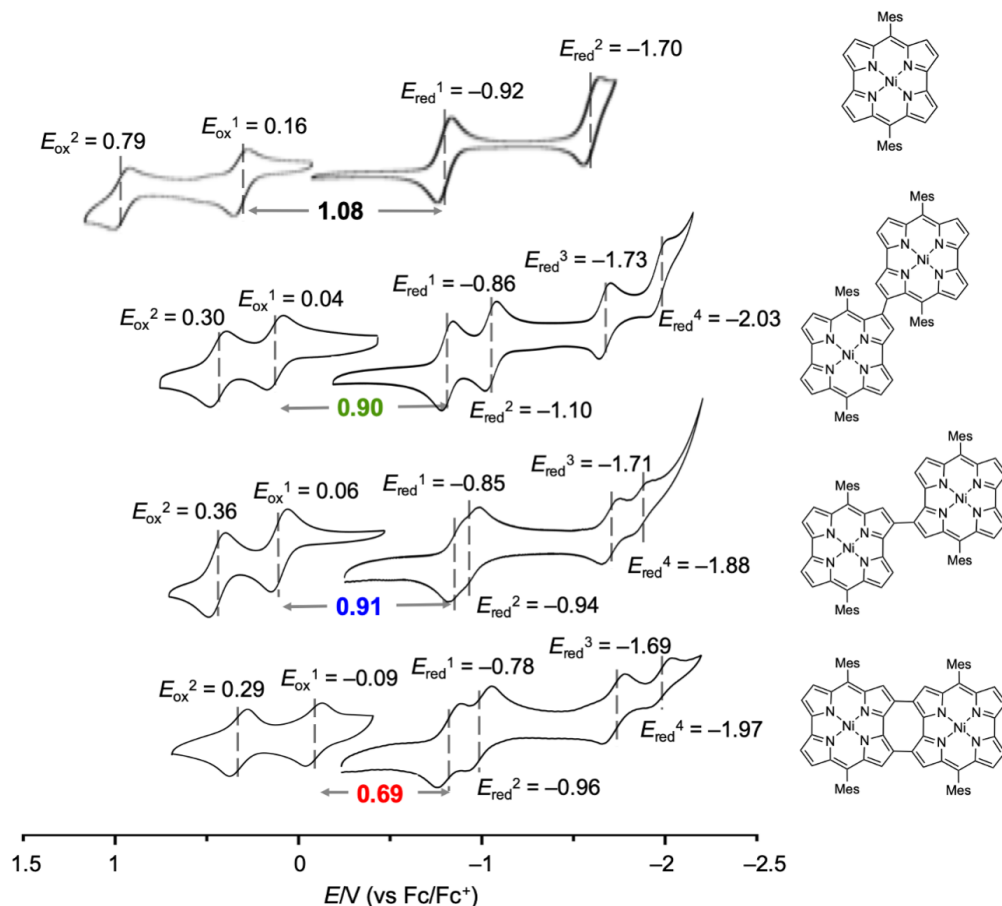

**Figure S10.** Cyclic voltammograms of **1**, **7**, **9**, and **10**.



## Theoretical Calculations

All calculations were carried out using the *Gaussian 09* program.<sup>3</sup> Initial geometries of the model compounds were obtained from their X-ray structures. Full optimizations were performed with Becke's three-parameter hybrid exchange functional and the Lee–Yang–Parr correlation functional (B3LYP)<sup>4</sup> and a basis set consisting of SDD<sup>5</sup> for Ni and 6-31G(d) for the rest. The calculated oscillator strengths were obtained with the TD-DFT method at the CAM-B3LYP<sup>6</sup>/6-31G(d)+SDD level.

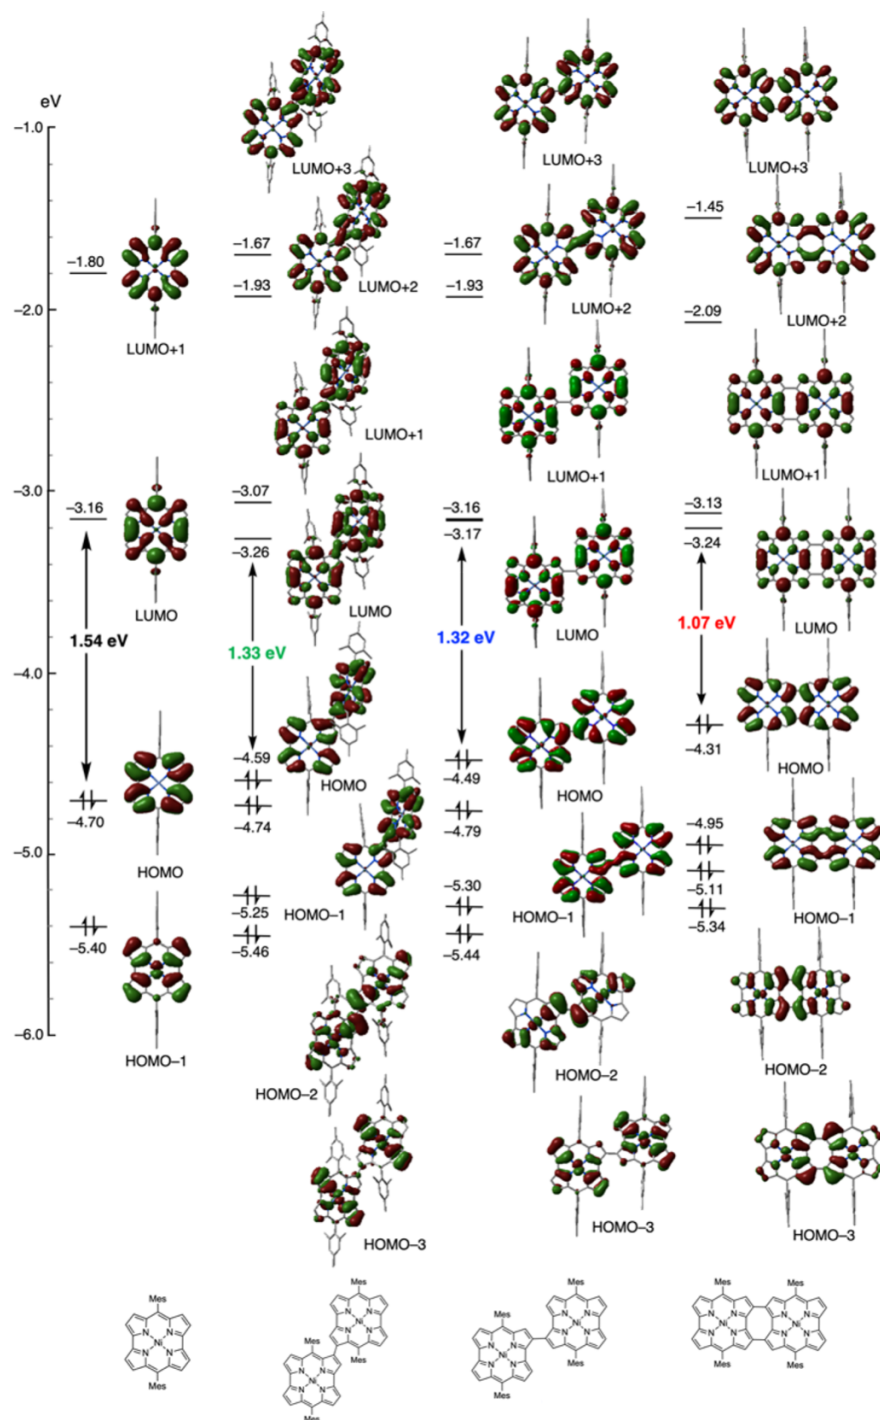

**Figure S11.** Calculated energy diagrams and molecular orbitals of **1**, **7**, **9**, and **10**.

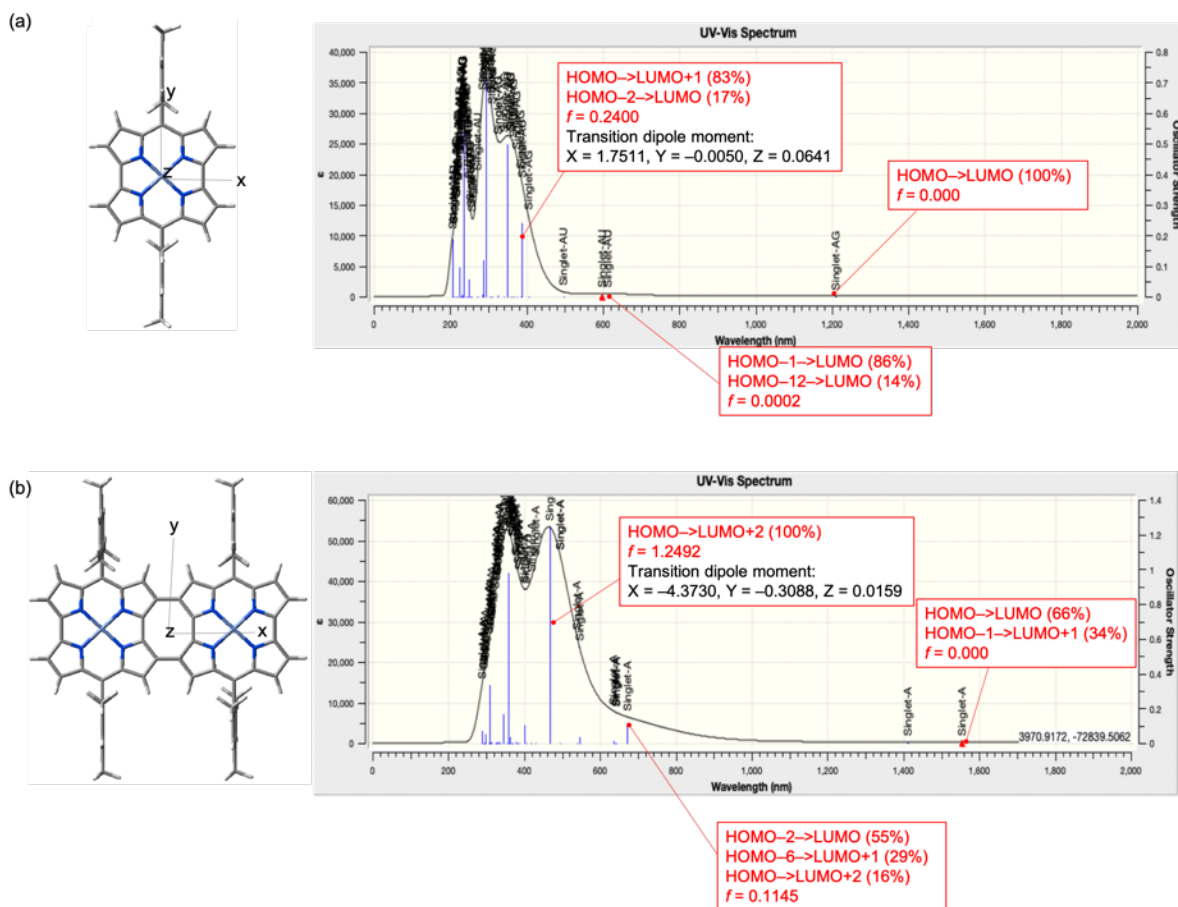

**Figure S12.** Simulated absorption spectra of (a) **1** and (b) **10**.

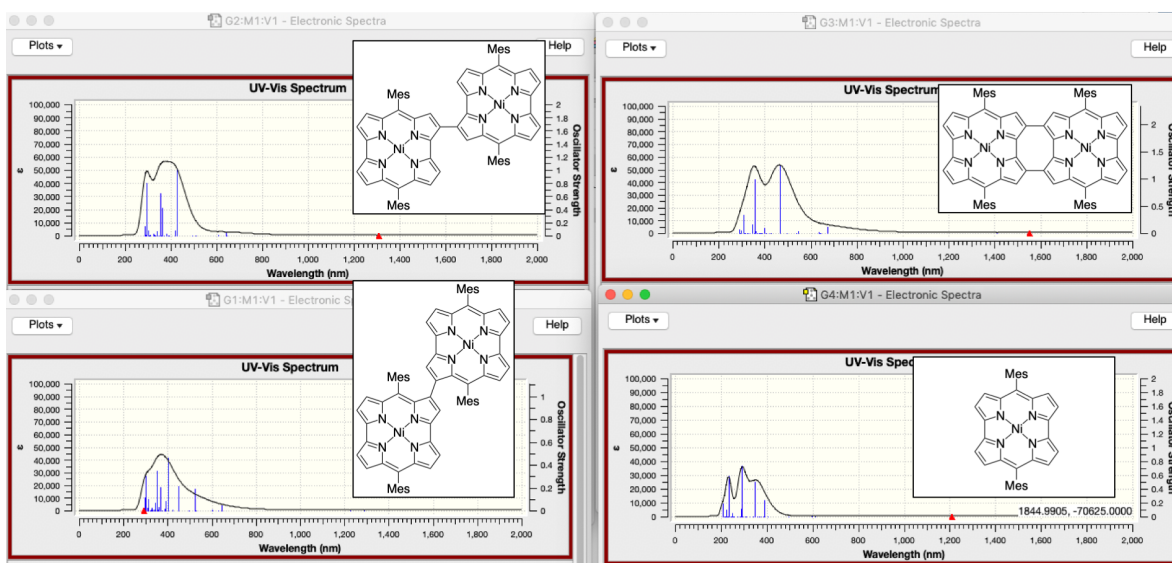

**Figure S13.** Comparison of simulated absorption spectra of **1**, **7**, **9**, and **10**.

|   | <b>A</b> |         | <b>B</b> |         |
|---|----------|---------|----------|---------|
|   | NICS(0)  | NICS(1) | NICS(0)  | NICS(1) |
| a | 5.9      | 5.0     | 11.3     | 9.9     |
| b | 5.9      | 5.0     | 12.6     | 11.3    |
| c | 5.9      | 5.0     | 11.3     | 9.9     |
| d | 5.9      | 5.0     | 12.6     | 11.3    |
| e | 45.6     | 38.5    | 67.4     | 56.7    |
| f | 45.6     | 38.5    | 67.4     | 56.7    |
| g | 46.0     | 40.1    | 70.6     | 59.9    |
| h | 46.0     | 40.1    | 61.2     | 52.6    |
| i |          |         | -17.5    | -14.8   |

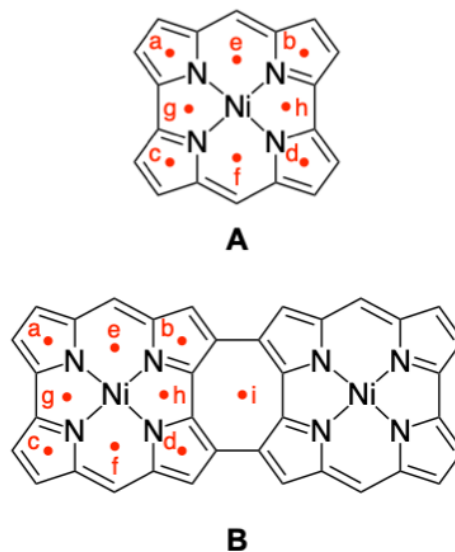

**Figure S14.** NICS(0) and NICS(1) values of monomer **A** and doubly linked dimer **B**.

Calculations were carried out at the B3LYP/6-31G(d)+SDD level of theory. Mesityl groups were replaced with hydrogen atoms to simplify the calculations.

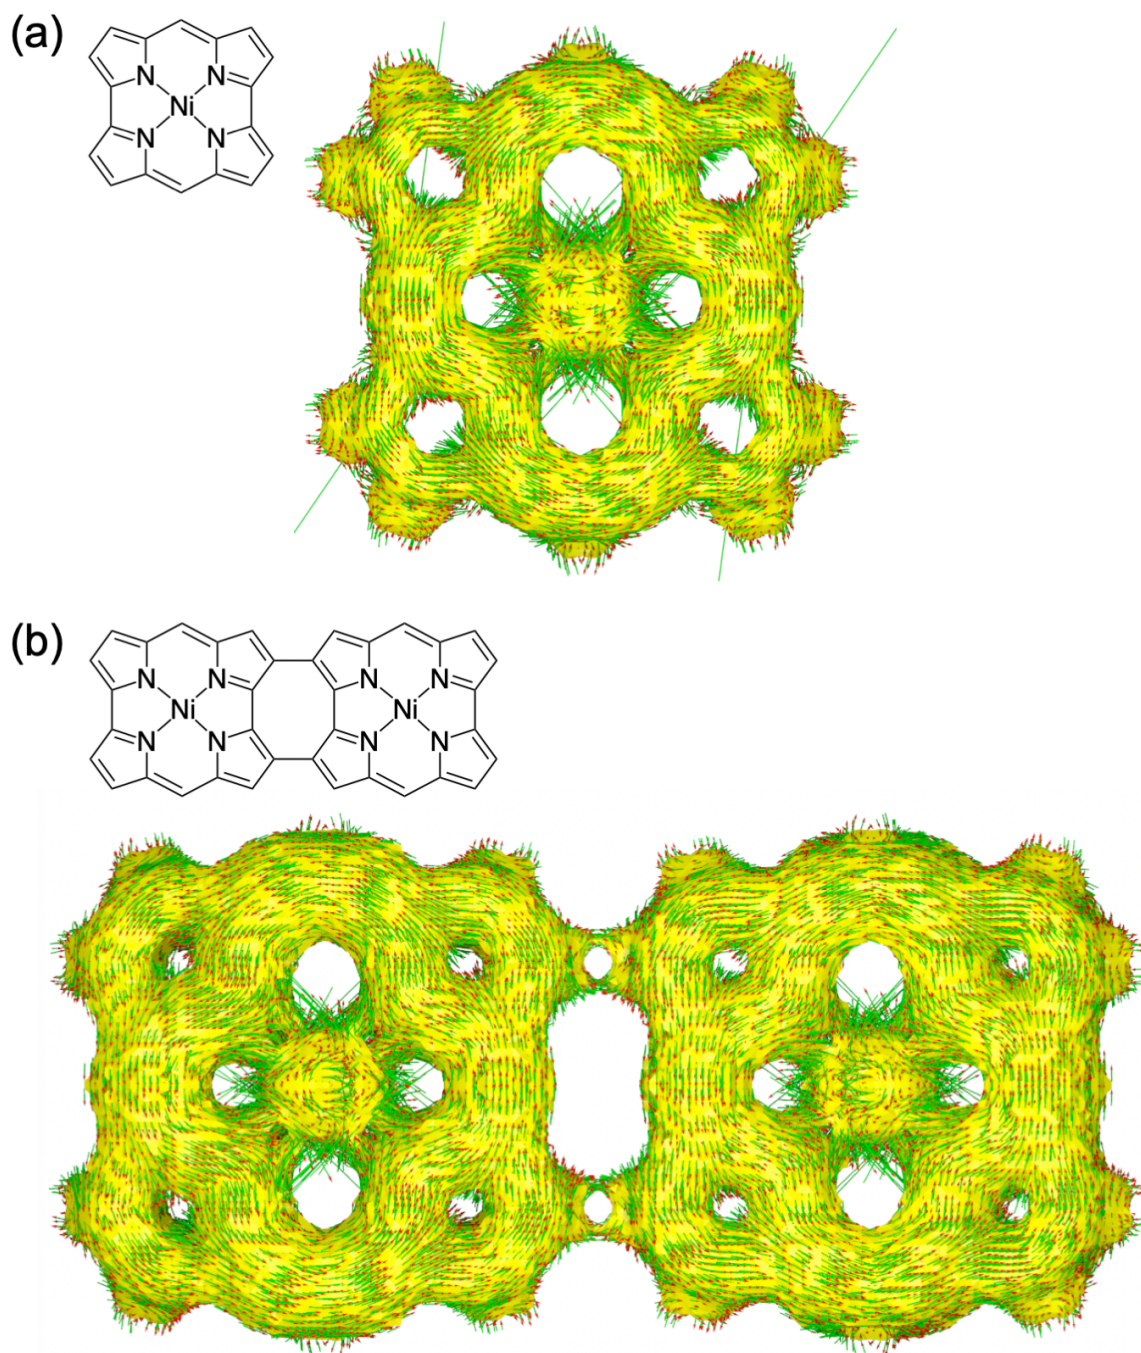

**Figure S15.** ACID plots of (a) monomer **A** and (b) doubly linked dimer **B**. Calculations were carried out at the B3LYP/6-31G(d)+SDD level of theory. Mesityl groups were replaced with hydrogen atoms to simplify the calculations.

## References

- 1) Kawashima, H.; Hiroto, S.; Shinokubo, H. *J. Org. Chem.* **2017**, 82, 10425.
- 2) Ito, T.; Hayashi, Y.; Shimizu, S.; Shin, J. Y.; Kobayashi, N.; Shinokubo, H. *Angew. Chem. Int. Ed.* **2012**, 51, 8542.
- 3) *Gaussian 09*, Revision D.01, Frisch, M. J.; Trucks, G. W.; Schlegel, H. B.; Scuseria, G. E.; Robb, M. A.; Cheeseman, J. R.; Scalmani, G.; Barone, V.; Mennucci, B.; Petersson, G. A.; Nakatsuji, H.; Caricato, M.; Li, X.; Hratchian, H. P.; Izmaylov, A. F.; Bloino, J.; Zheng, G.; Sonnenberg, J. L.; Hada, M.; Ehara, M.; Toyota, K.; Fukuda, R.; Hasegawa, J.; Ishida, M.; Nakajima, T.; Honda, Y.; Kitao, O.; Nakai, H.; Vreven, T.; Montgomery, Jr., J. A.; Peralta, J. E.; Ogliaro, F.; Bearpark, M.; Heyd, J. J.; Brothers, E.; Kudin, K. N.; Staroverov, V. N.; Kobayashi, R.; Normand, J.; Raghavachari, K.; Rendell, A.; Burant, J. C.; Iyengar, S. S.; Tomasi, J.; Cossi, M.; Rega, N.; Millam, J. M.; Klene, M.; Knox, J. E.; Cross, J. B.; Bakken, V.; Adamo, C.; Jaramillo, J.; Gomperts, R.; Stratmann, R. E.; Yazyev, O.; Austin, A. J.; Cammi, R.; Pomelli, C.; Ochterski, J. W.; Martin, R. L.; Morokuma, K.; Zakrzewski, V. G.; Voth, G. A.; Salvador, P.; Dannenberg, J. J.; Dapprich, S.; Daniels, A. D.; Farkas, Ö.; Foresman, J. B.; Ortiz, J. V.; Cioslowski, J.; Fox, D. J. Gaussian, Inc., Wallingford CT, **2009**.
- 4) (a) Becke, A. D. *Phys. Rev. A* **1988**, 38, 3098. (b) Lee, C.; Yang, W.; Parr, R. G. *Phys. Rev. B* **1988**, 37, 785.
- 5) Dolg, M.; Wedig, U.; Stoll, H.; Preuss, H. *J. Chem. Phys.* **1987**, 86, 866.
- 6) Yanai, T.; Tew, D.; Handy, N. *Chem. Phys. Lett.* **2004**, 393, 51.
